# Supplementary material for: Basic surface features of nuclear FKBPs facilitate chromatin binding
Source: PubMed Central journal article supplement (PMC5476585; doi:10.1038/s41598-017-04194-7), 2017-06-19

## **Supplementary Information File**

Full-length gels and blots for:

Figures 1C, D

Figure 2B

Figure 3A, B

Figure 5B

## **Basic surface features of nuclear FKBP<sub>s</sub> facilitate chromatin binding**

Andrew Leung<sup>1</sup>, Francy-Pesek Jardim<sup>1</sup>, Neda Savic<sup>1</sup>, Yoan R. Monneau<sup>2</sup>, Rodrigo González-Romero<sup>3</sup>, Geoff Gudavicius<sup>1</sup>, Jose M Eirin-Lopez<sup>3</sup>, Till Bartke<sup>4,5</sup>, Cameron D. Mackereth<sup>2</sup>, Juan Ausió<sup>1</sup>, and Christopher J Nelson<sup>1\*</sup>

Figure 1C

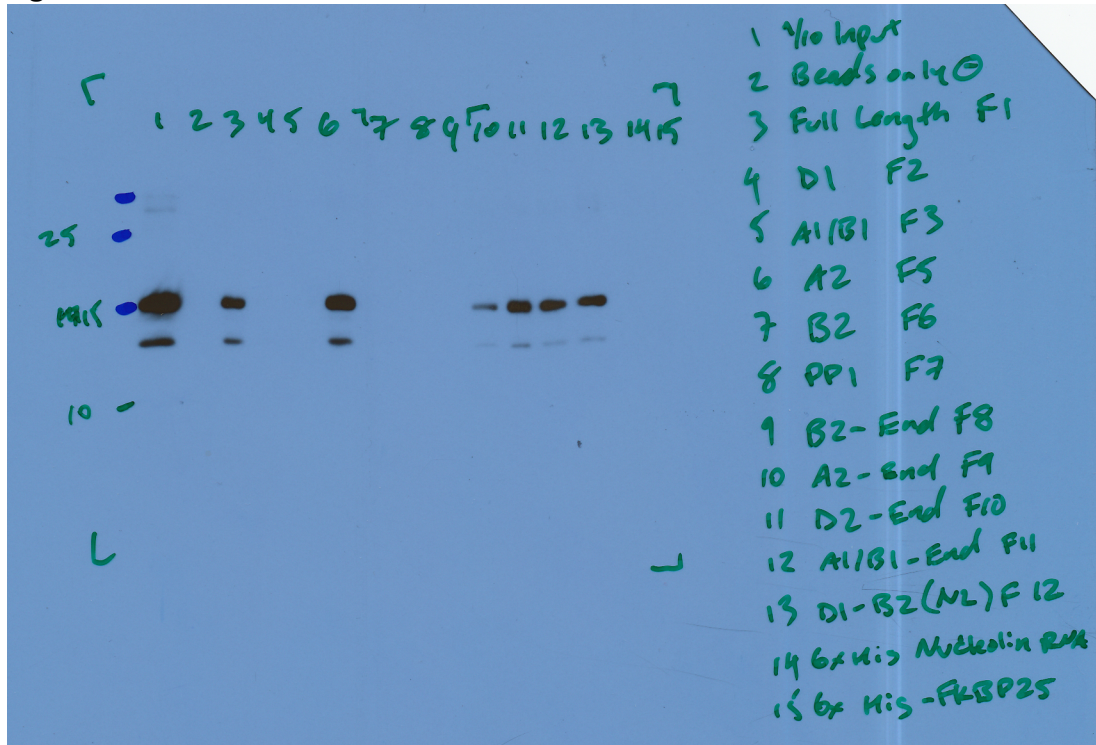

Figure 1D

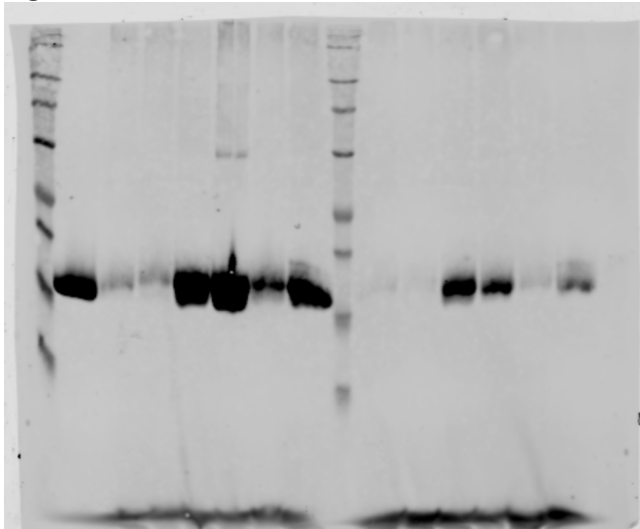

Figure 2B

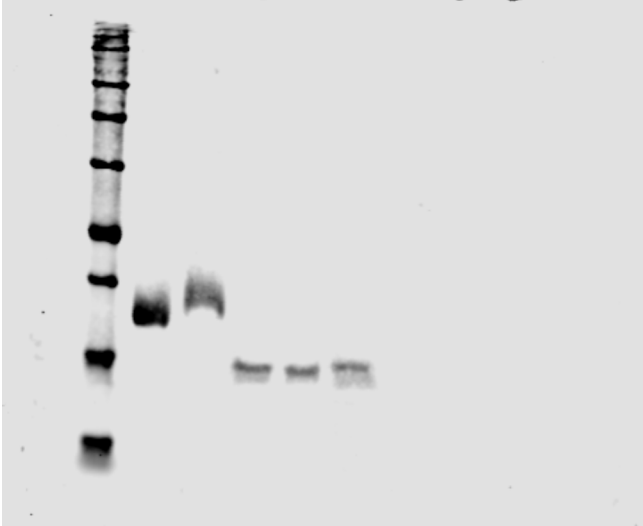

Figure 3A

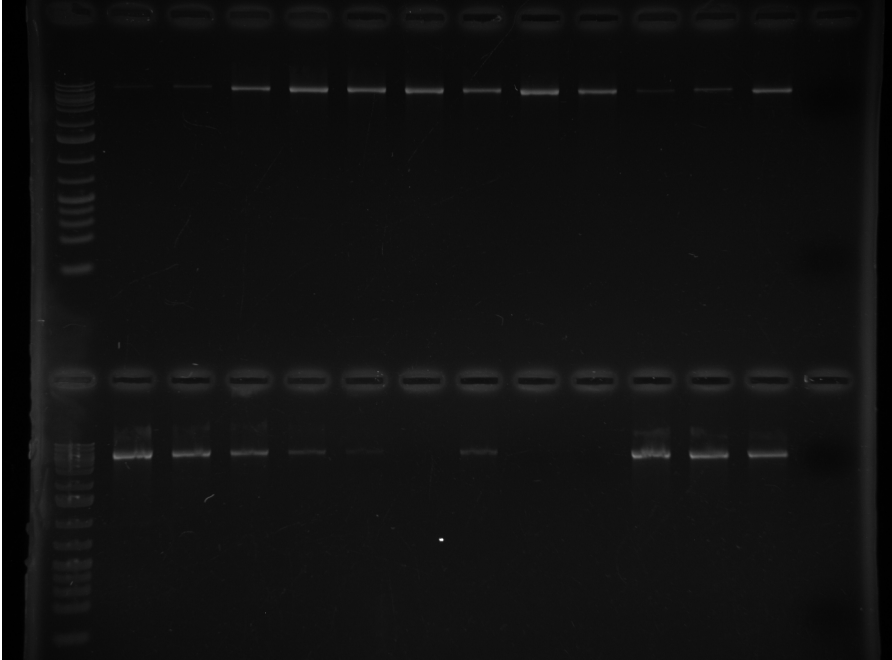

Figure 3B

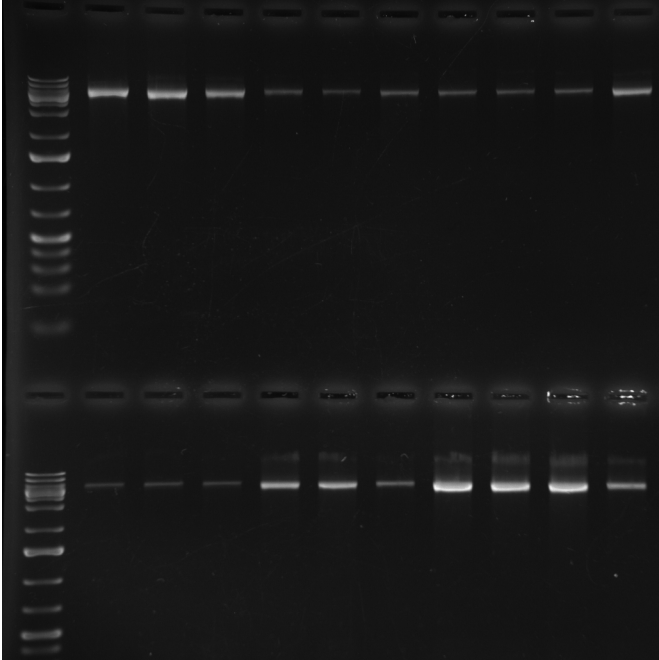



Figure 5B

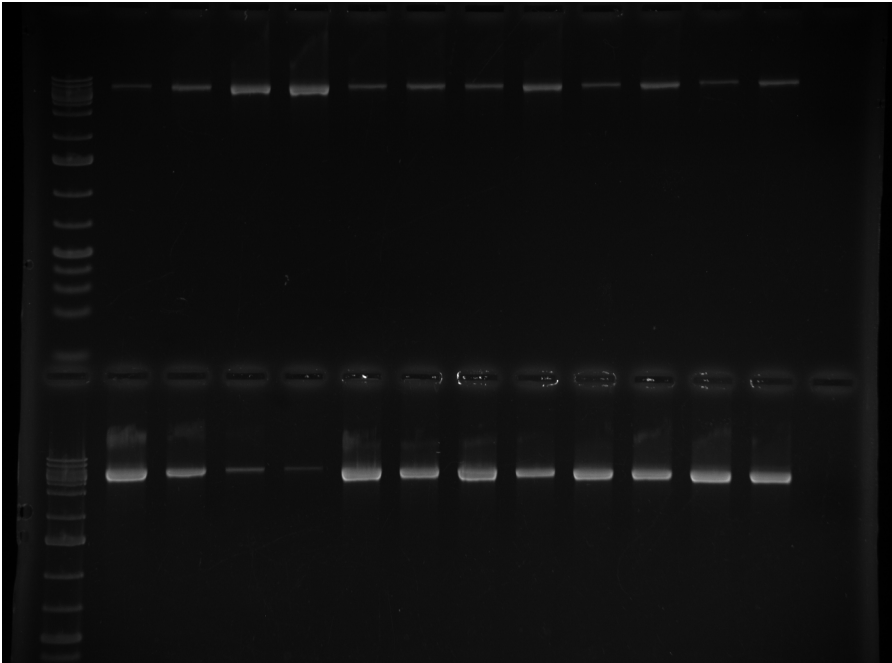

Supplement: 41598_2017_4194_MOESM1_ESM.pdf [file 41598_2017_4194_MOESM1_ESM.pdf]
